# Supplementary material for: Molecular basis of genetic plasticity to varying environmental conditions on growing rice by dry/direct-sowing and exposure to drought stress: Insights for DSR varietal development
Source: Front Plant Sci. 2022 Oct 24;13:1013207. doi: 10.3389/fpls.2022.1013207 (PMC9638133; doi:10.3389/fpls.2022.1013207)
Supplement: Supplementary file 10 [file Table_10.xlsx]

## Sheet: N22
Supplementary Table S15: Differential expression of genes for response to stress in rice on changing the methods of planting.
Gene ID	N 22, Leaf DS Log2 FC	N 22, Leaf DS®TP Log2FC		N 22, Leaf TP Log2 FC	N 22, Leaf TP®DS log2FC		N 22, Root DS Log2 FC	N 22, Root DS®TP Log2FC		N 22, Root TP Log2 FC	N 22, Root TP®DS log2FC	Annotation
	Leaf						Root
LOC_Os05g28740	11.2337	3.8827		7.54891	4.97516		1.2463	-1.88873		-0.0396152	-0.92182	Universal stress protein domain containing protein, putative, expressed
LOC_Os12g36640	4.6662	1.90126		1.76199	3.32507		0.937858	0.240884		-0.0844693	0.537369	Universal stress protein domain containing protein, putative, expressed
LOC_Os02g47840	3.55872	1.51667		1.49995	2.04854		2.14419	1.25288		1.35445	1.75481	Universal stress protein domain containing protein, putative, expressed
LOC_Os05g07810	3.55701	NA		NA	-4.78512		-1.66367	-3.76187		-6.97231	-1.59669	Universal stress protein domain containing protein, putative, expressed
LOC_Os01g32780	3.2094	1.90132		2.15662	0.969834		0.330998	0.466868		0.82356	1.43575	Universal stress protein domain containing protein, putative, expressed
LOC_Os01g57450	3.17059	1.07462		0.751692	1.05998		-0.0628639	0.717207		0.184811	0.763366	Universal stress protein domain containing protein, putative, expressed
LOC_Os05g06500	2.8783	2.22471		1.70475	1.82109		-0.819121	-1.56723		-0.261103	-1.03542	Universal stress protein domain containing protein, putative, expressed
LOC_Os02g47650	2.38913	-0.804326		-0.263661	1.82498		-0.347439	-1.70635		1.03434	-1.24809	Universal stress protein domain containing protein, putative, expressed
LOC_Os11g26750	5.99945	8.41807		2.22509	7.86748		7.85631	9.80928		9.15415	11.5131	Dehydrin, putative, expressed
LOC_Os11g26790	11.3922	10.2973		1.84657	11.1252		7.02237	9.12476		6.67556	11.043	Dehydrin, putative, expressed
LOC_Os11g26780	8.46123	8.54306		0.59573	9.33641		7.44087	8.04139		6.50587	11.2842	Dehydrin, putative, expressed
LOC_Os11g26780	8.46123	8.54306		0.59573	9.33641		7.44087	8.04139		6.50587	11.2842	Dehydrin, putative, expressed
LOC_Os11g26760	6.4808	11.6697		NA	7.0915		11.391	9.46094		9.27047	14.6461	Dehydrin, putative, expressed
LOC_Os11g26570	4.62761	4.40046		1.22509	1.99188		6.08139	7.55432		6.56477	11.1138	Dehydrin, putative, expressed
LOC_Os07g48010	10.3106	-1.2289		2.07551	7.12261		3.90257e-07	-3.52766		-5.97133	-5.24525	Peroxidase precursor, putative, expressed
LOC_Os07g48020	9.40439	-0.353766		2.08931	7.47934		-6.22881	-10.0906		-9.09162	-4.03139	Peroxidase precursor, putative, expressed
LOC_Os07g48040	9.18327	-1.06507		2.127	4.94912		-2.58496	-0.419132		-4.44777	-0.802568	Peroxidase precursor, putative, expressed
LOC_Os07g47990	5.10487	0.618076		1.03959	4.20675		-3.62161	-4.80185		-6.23169	-8.01581	Peroxidase precursor, putative, expressed
LOC_Os07g48050	4.27722	0.115056		3.16368	5.00714		NA	-5.03174		-4.03274	NA	Peroxidase precursor, putative, expressed
LOC_Os07g48060	2.05694	-0.469906		2.09955	-0.605467		1.75084	-4.15136		-0.158969	-1.65107	Peroxidase precursor, putative, expressed
LOC_Os02g02400	3.6781	-2.00178		2.44648	0.345589		3.41942	1.33895		2.13188	2.4399	Catalase isozyme A, putative, expressed
LOC_Os01g73250	8.73699	-2.41824		-2.23082	6.99763		-4.98603	-1.18011		-1.12066	-5.93739	Abscisic stress-ripening, putative, expressed
LOC_Os11g06720	4.4391	0.600255		0.187734	3.25636		0.0481536	-0.597541		1.05569	-1.34538	Abscisic stress-ripening, putative, expressed
LOC_Os04g34600	3.58153	0.553526		-0.904459	2.91139		-6.38197	-4.12586		0.441616	-4.69912	Abscisic stress-ripening, putative, expressed
LOC_Os01g72900	2.5226	-0.955334		2.00269	1.1315		-2.74018	-4.12304		-1.26605	-3.4111	Abscisic stress-ripening, putative, expressed
LOC_Os07g06190	5.96382	0.066146		0.405659	4.83747		2.16992	2.42475		1.20136	2.51936	Ethylene-insensitive protein 2, putative, expressed
LOC_Os01g12580	5.74594	2.38807		-1.35988	2.42244		3.70044	6.59209		4.9836	8.81844	Late embryogenesis abundant protein, putative, expressed
LOC_Os01g21250	2.81444	-1.66938		-3.99231	4.6784		-0.992867	-0.139025		2.12419	-0.98489	Late embryogenesis abundant protein, putative, expressed
LOC_Os01g57340	5.86797	0.420864		0.340564	6.04019		0.0685643	0.897724		0.554338	-0.247708	Rp1, putative, expressed
LOC_Os01g57310	5.59915	-0.054869		1.22509	5.42217		-0.485426	-0.226488		-0.00508888	-0.287995	Rp1, putative, expressed
LOC_Os06g18820	5.12916	-0.408369		1.41883	4.80922		0.745596	1.83772		1.47239	1.50583	Serine threonine kinase, putative, expressed
LOC_Os06g37620	2.56925	0.796526		1.51212	2.97385		-0.616307	0.360477		0.269173	-1.01225	Protein kinase family protein, putative, expressed
LOC_Os12g07990	2.4784	NA		5.25273	-5.46319		-1.49643	-6.97034		-5.97133	-2.52139	Protein kinase family protein, putative, expressed
LOC_Os10g01060	2.02719	-0.786692		1.20572	1.84713		-0.0848889	0.240225		1.55515	-0.525859	Protein kinase family protein, putative, expressed
LOC_Os11g29990	7.52514	-2.39739		-0.114299	8.09459		-3	3.43859		NA	-1.21761	NBS-LRR type disease resistance protein, putative, expressed
LOC_Os11g45180	6.44714	1.86994		0.0995559	8.76202		2.08746	-1.17402		1.52543	2.84129	NBS-LRR disease resistance protein, putative, expressed
LOC_Os04g53030	3.0672	-0.555637		0.273585	2.85724		1.42675	2.25254		1.23001	1.27378	NBS-LRR disease resistance protein, putative, expressed
LOC_Os01g25630	4.27722	2.85202		-4.38752	8.32906		1.37534	0.676532		1.06481	1.41156	NB-ARC domain containing protein, expressed
LOC_Os11g45060	4.27722	2.48429		-3.80256	7.37637		1.90689	3.41094		2.57987	2.44536	NB-ARC domain containing protein, expressed
LOC_Os12g10710	3.72849	-0.383017		0.0463734	3.9998		1.243	1.50482		1.8435	0.732231	NB-ARC domain containing protein, expressed
LOC_Os12g18374	2.25304	-1.23979		-0.86057	1.56446		1.52535	-0.117553		2.18756	-0.00111436	NB-ARC domain containing protein, expressed
LOC_Os03g27280	5.32977	-0.147417		0.523005	3.05687		0.970831	1.19908		1.12707	1.93043	CAMK_CAMK_like.19 - CAMK includes calcium/calmodulin depedent protein kinases
LOC_Os12g39630	5.32079	2.11505		6.13997	-1.41282		4.22448	1.40116		3.55033	0.630391	CAMK_CAMK_like.49 - CAMK includes calcium/calmodulin depedent protein kinases
LOC_Os02g34600	4.44598	1.68054		0.906264	3.73054		0.565526	-0.0835933		0.266885	0.10362	CAMK_CAMK_like.13 - CAMK includes calcium/calmodulin depedent protein kinases
LOC_Os04g59450	3.93983	0.260231		0.478688	2.85044		-0.230509	-1.38534		-0.846342	-1.20814	CAMK_CAMK_like.28 - CAMK includes calcium/calmodulin depedent protein kinases
LOC_Os01g55880	3.90779	-3.34882		-1.80854	3.27717		0.88789	-0.371827		-0.218493	-0.258633	Hemimethylated DNA binding domain containing protein, expressed
LOC_Os08g07540	2.57128	-1.94221		-0.122566	0.984017		1.4886	0.580867		0.636181	0.74157	Hemimethylated DNA binding domain containing protein, expressed
LOC_Os11g45924	3.64189	-3.08882		-1.26258	4.78684		0.502501	-0.141599		-0.879558	2.44536	WRKY41, expressed
LOC_Os01g71690	3.34094	0.0239734		2.13724	0.811372		0.337035	0.266552		0.427022	-0.0392689	RecA protein, expressed
LOC_Os11g32880	3.12647	-0.926387		1.09314	2.26481		3.96061	1.91837		2.29657	2.87001	DEAD-box ATP-dependent RNA helicase, putative, expressed
LOC_Os04g42784	2.75476	-1.54683		-0.148624	2.62116		0.501337	1.39926		1.0294	0.612469	DNA mismatch repair protein, putative, expressed
LOC_Os06g08670	2.53984	-2.49005		-1.19427	3.27221		-0.918386	0.0766873		-0.0906648	0.314669	Glutathione peroxidase, putative, expressed
LOC_Os04g46960	2.16613	-0.20972		0.45185	2.71414		-1.41298	-0.262753		0.34964	-0.98137	Glutathione peroxidase domain containing protein, expressed
The value indicates Log2 Fold change in expression of the gene under the reproductive stage drought stress over the control conditions.
	N 22= Nagina 22
	DS= Direct-sown
	TP= Transplanted
	DS®TP= Seeds from the continously direct-sown plants were grown by transplanting.
	TP®DS = Seeds from the continously transplanted plants were grown by direct showing.
	FC= Fold change
	NA= No expression of the gene was detected
